# Supplementary material for: Antiprotozoal Activity against Entamoeba histolytica of Plants Used in Northeast Mexican Traditional Medicine. Bioactive Compounds from Lippia graveolens and Ruta chalepensis
Source: PubMed Central journal article supplement (PMC6271573; doi:10.3390/molecules191221044), 2014-12-15

# Supplementary Materials

Figure S1. <sup>1</sup>H-NMR Spectrum of Carvacrol (1) CDCl<sub>3</sub>, 400 MHz).

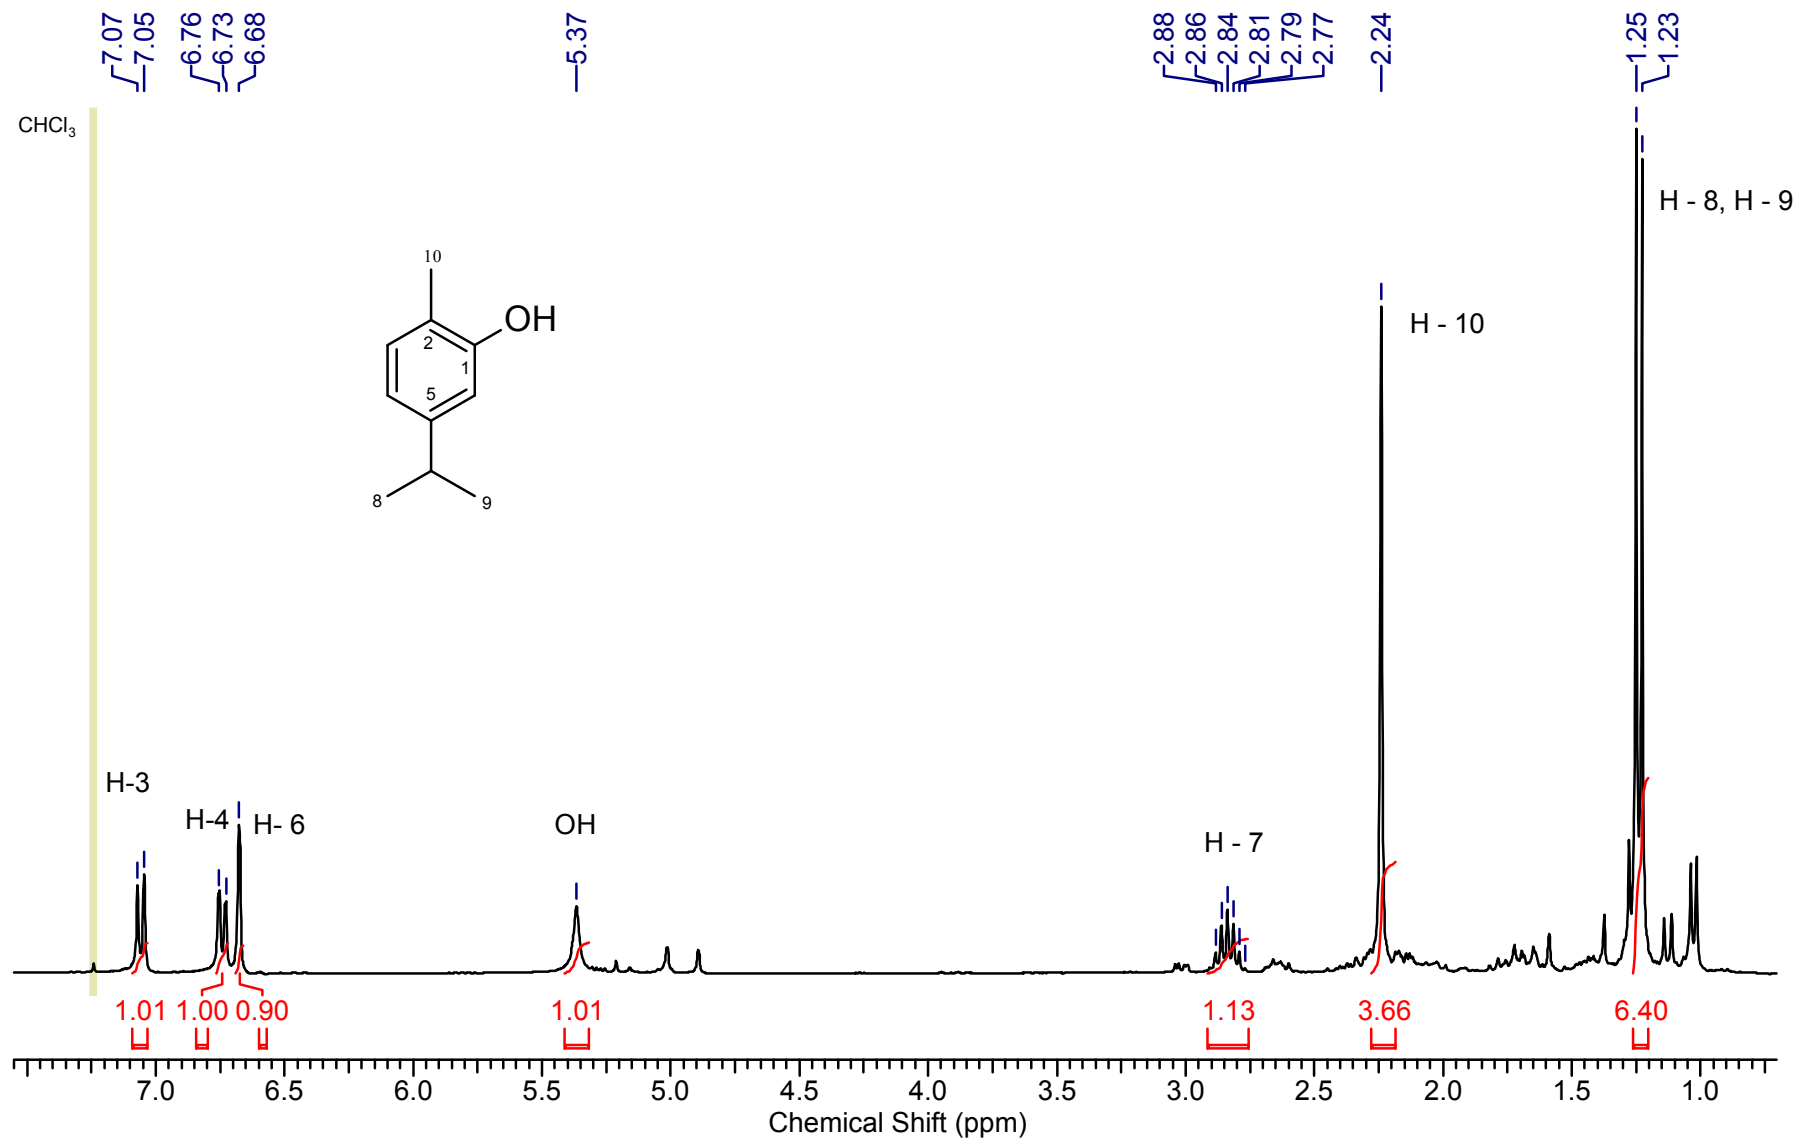

**Figure S2.**  $^{13}\text{C}$ -NMR Spectrum of Carvacrol (**1**) ( $\text{CDCl}_3$ , 100 MHz).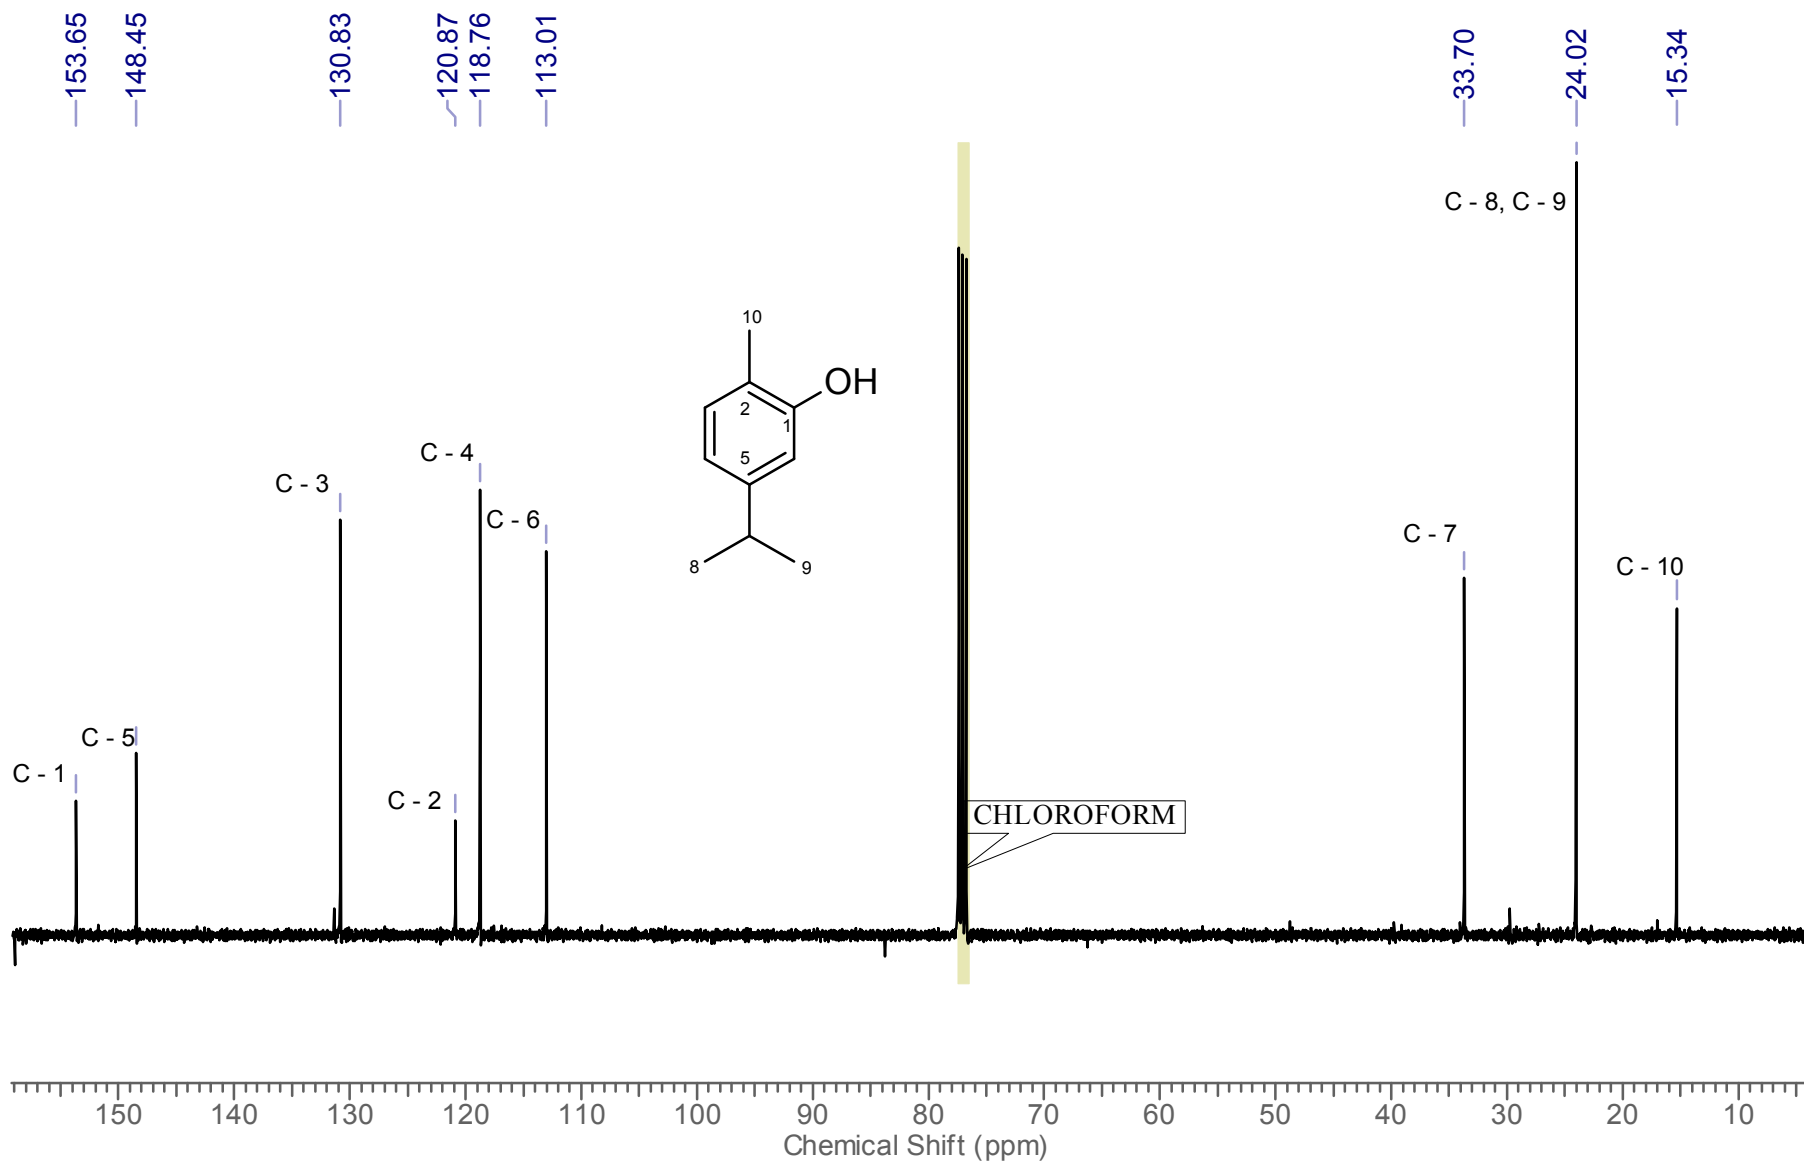

**Figure S3.** ATP  $^{13}\text{C}$ -NMR Spectrum of Carvacrol ( $\text{CDCl}_3$ , 100 MHz).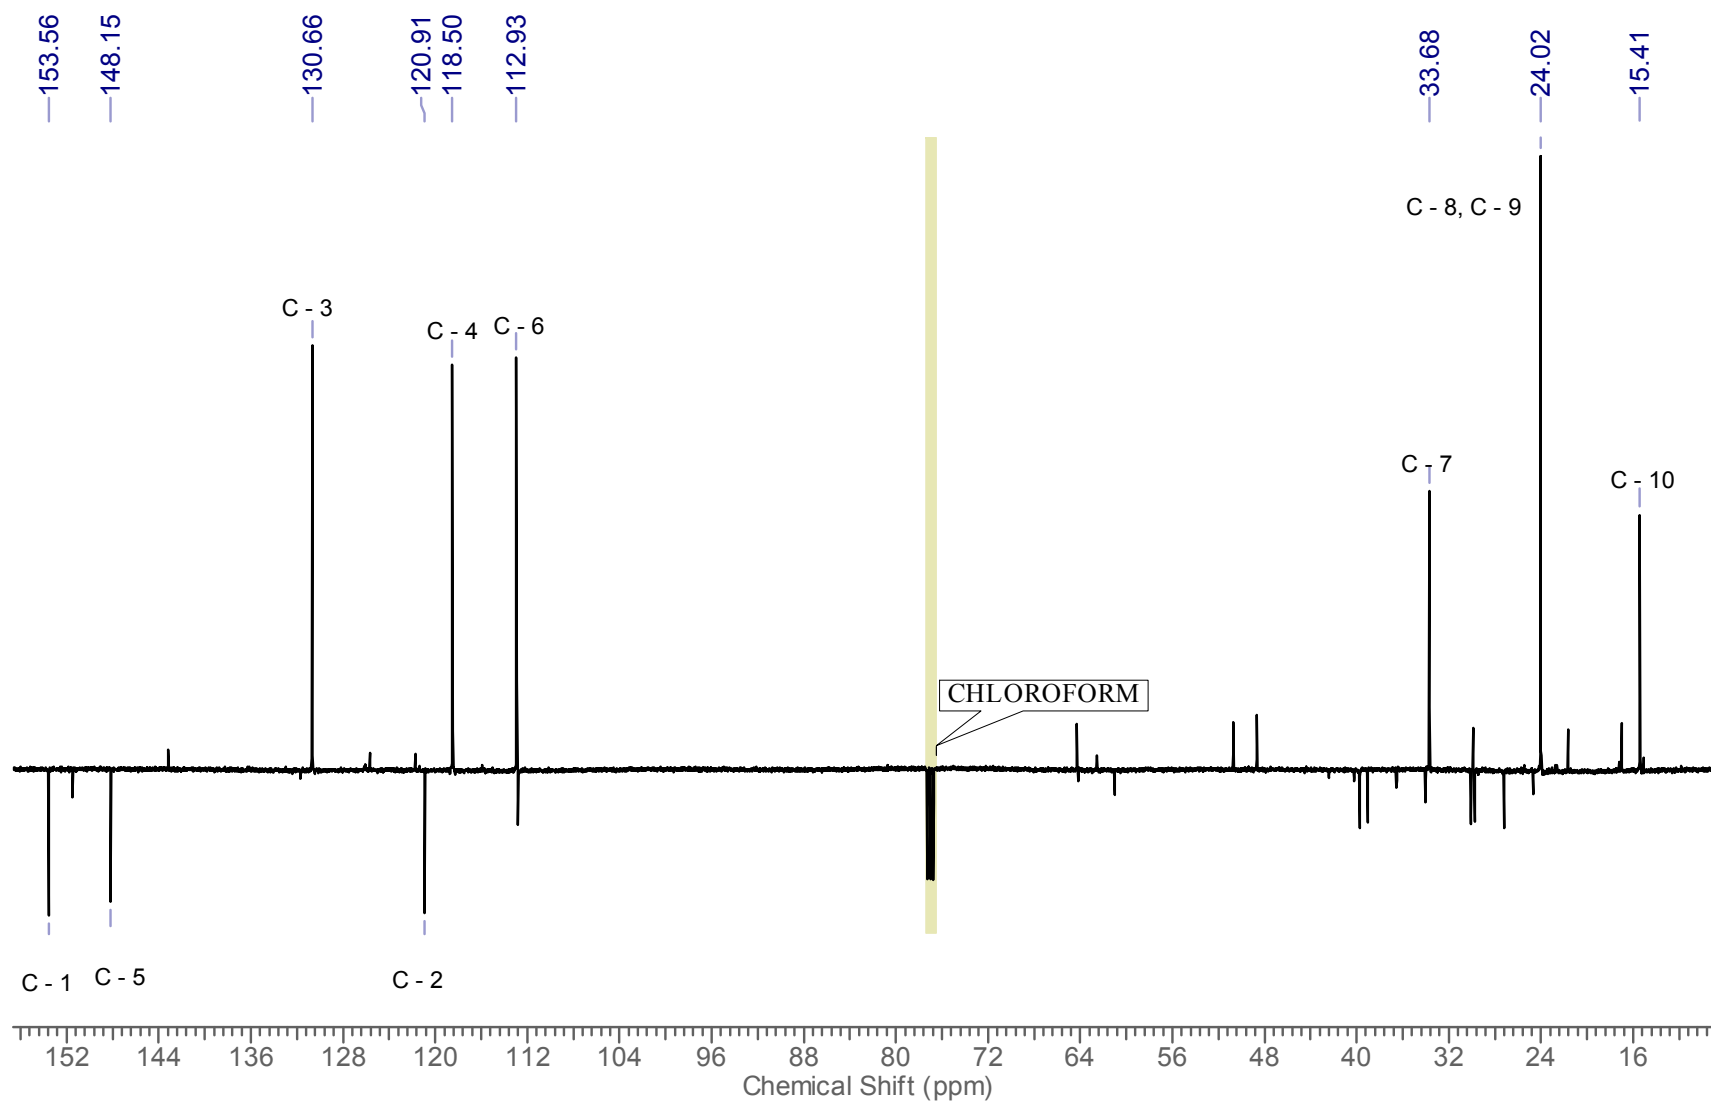

**Figure S4.** COSY Spectrum of Carvacrol (**1**) (CDCl<sub>3</sub>, 400 MHz).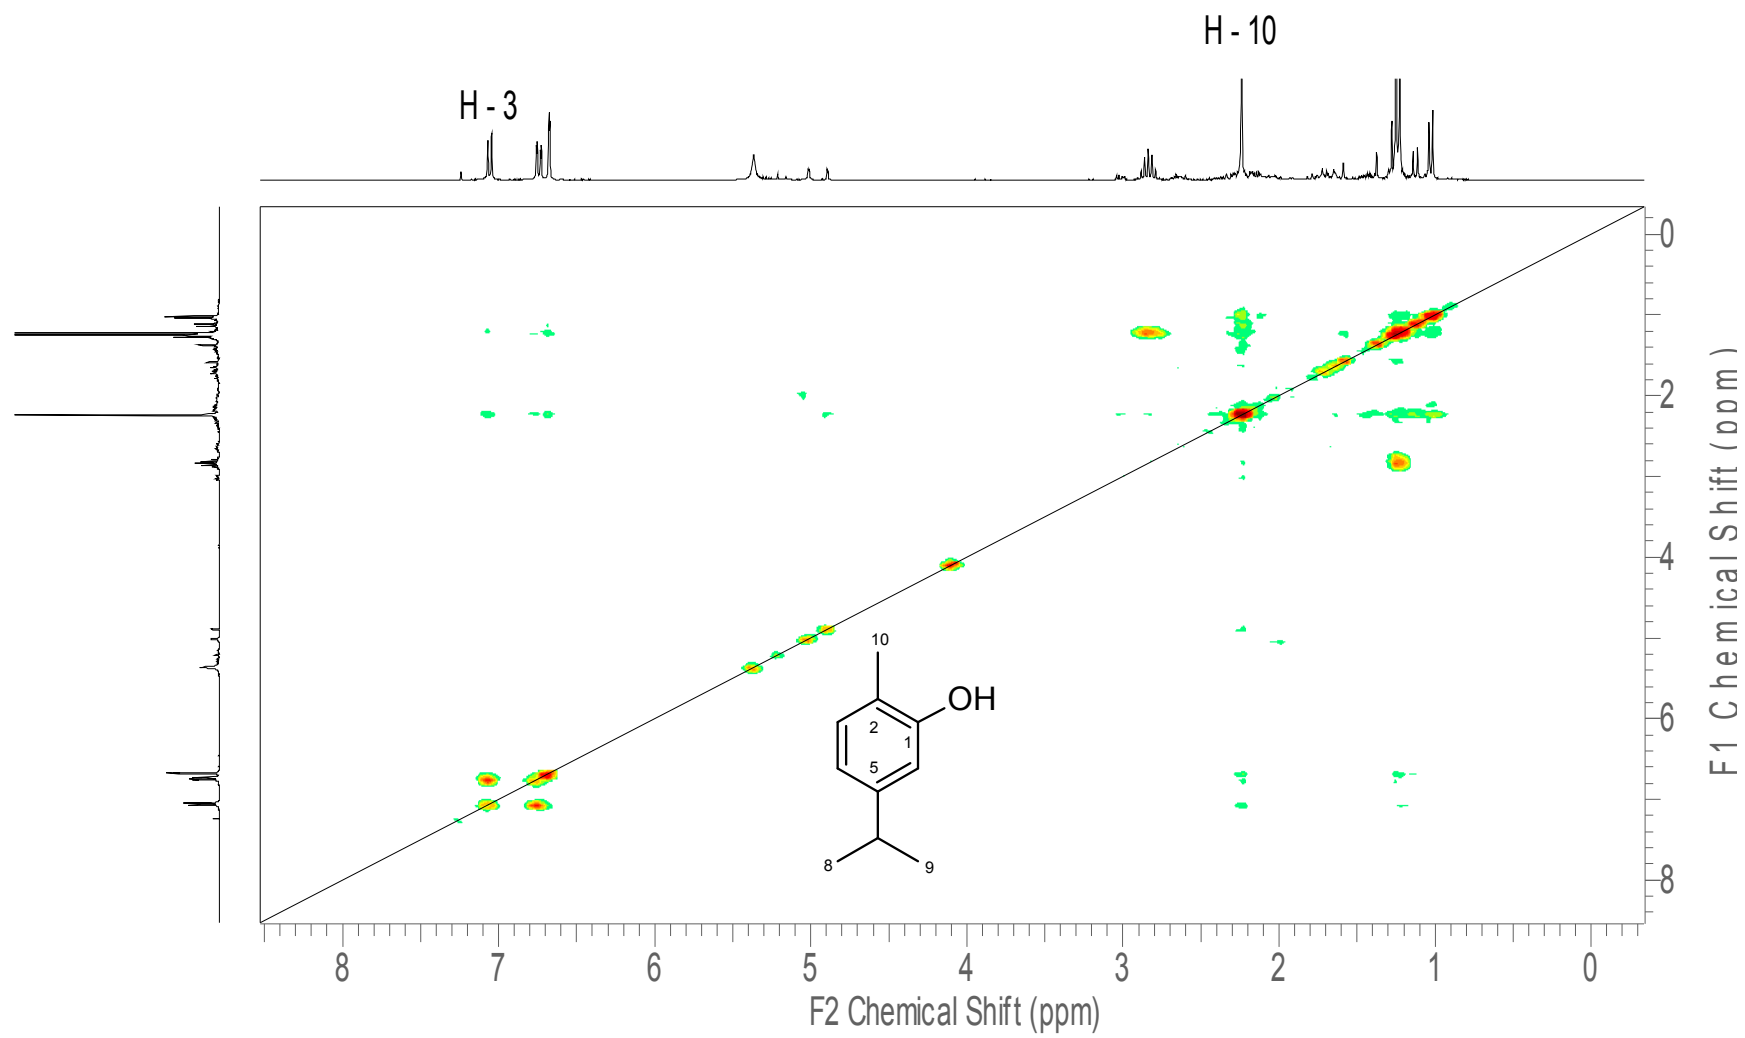

**Figure S5.**  $^1\text{H-NMR}$  spectrum of Chalepensin (**2**) ( $\text{CDCl}_3$ , 400 MHz).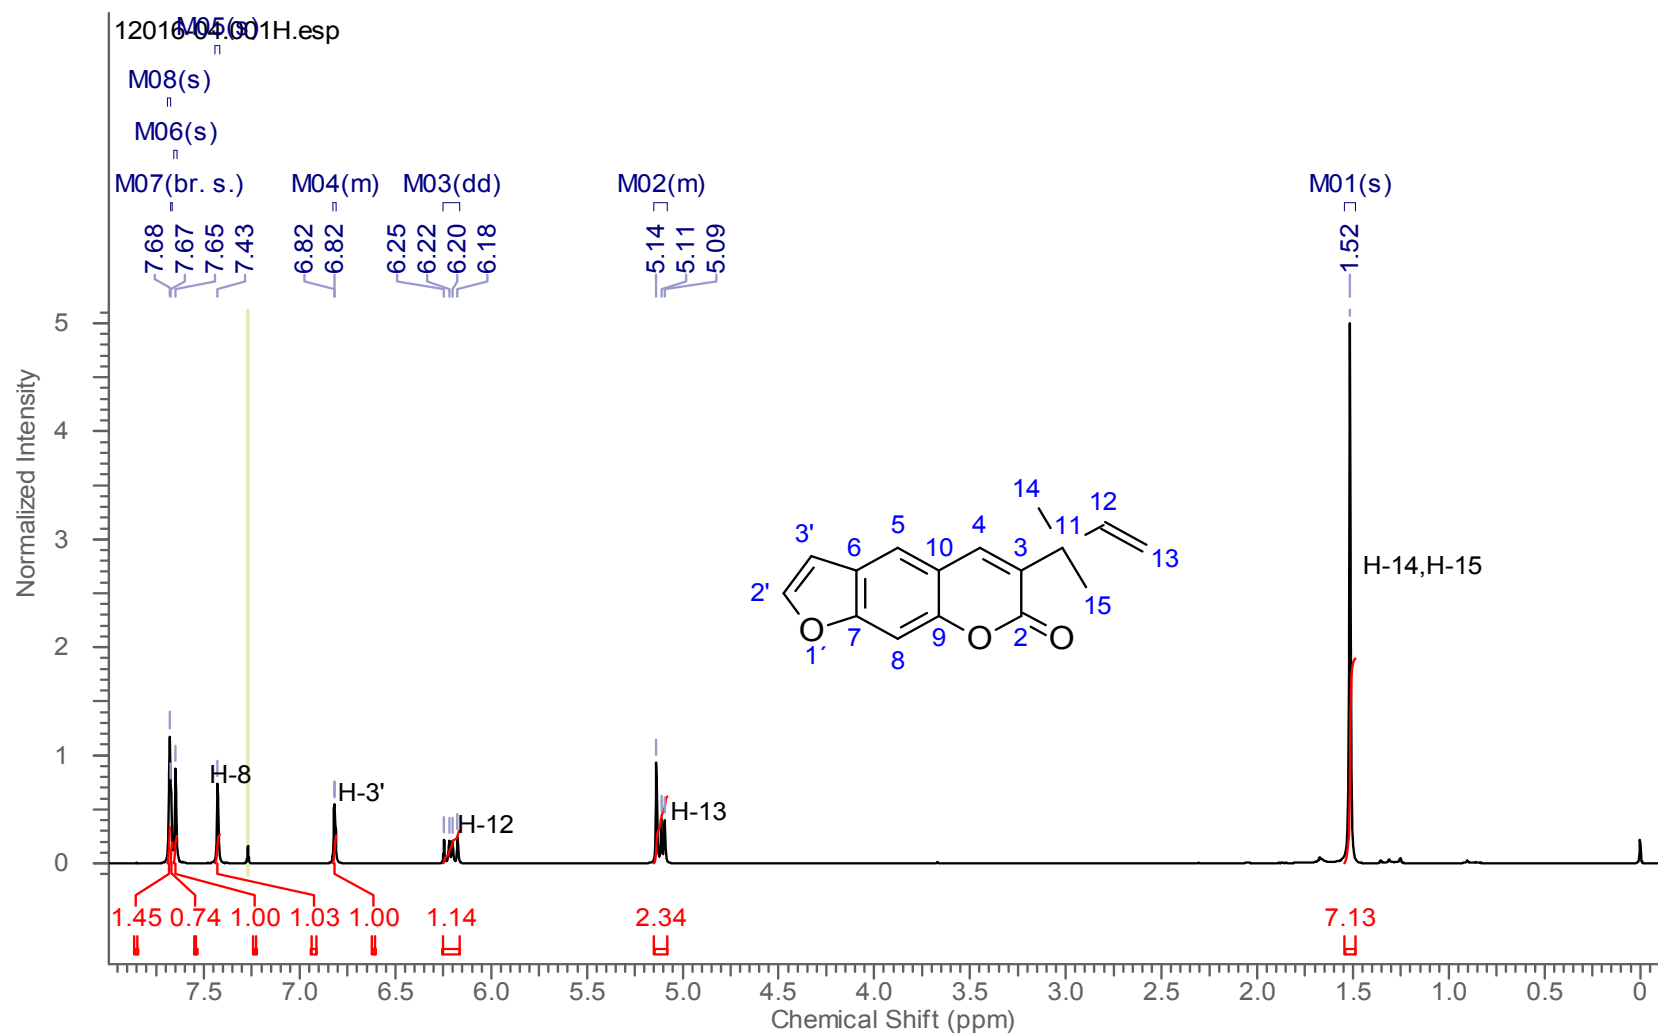

**Figure S6.**  $^1\text{H-NMR}$  spectrum of Chalepensis (**2**) ( $\text{CDCl}_3$ , 400 MHz).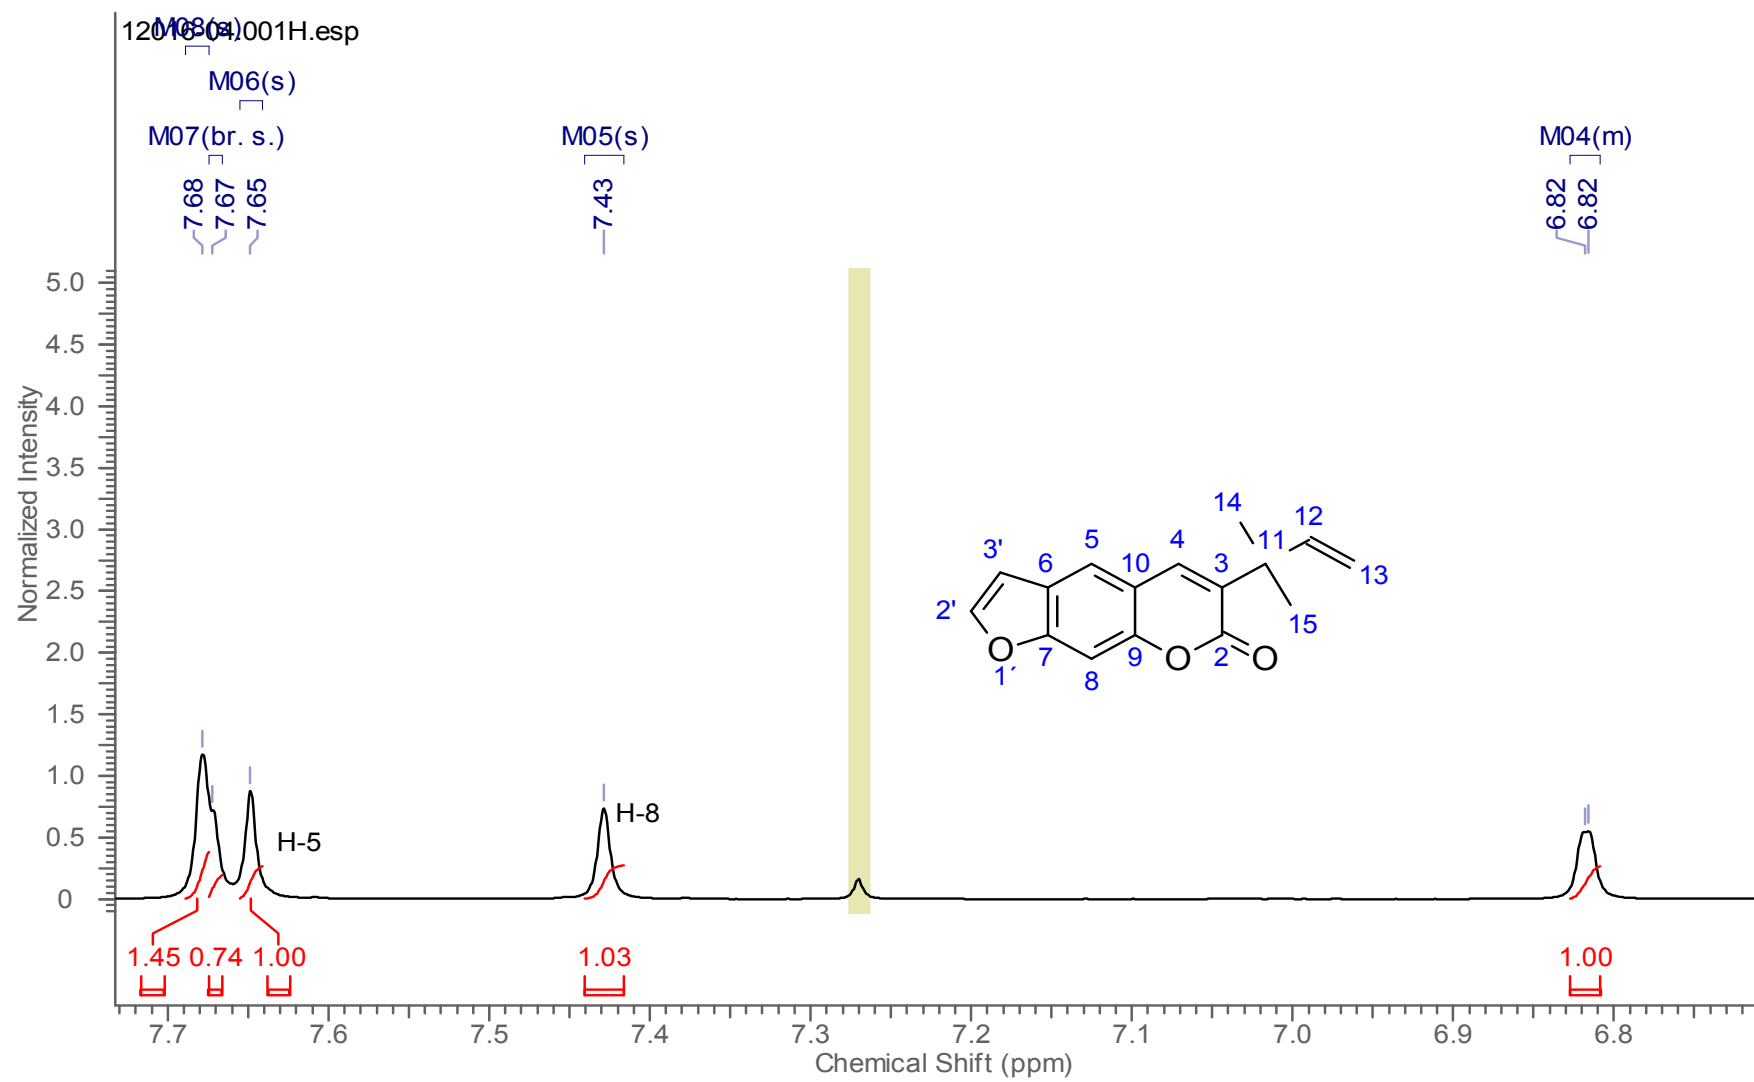

**Figure S7.**  $^1\text{H-NMR}$  spectrum of Chalepensisin (**2**) ( $\text{CDCl}_3$ , 400 MHz).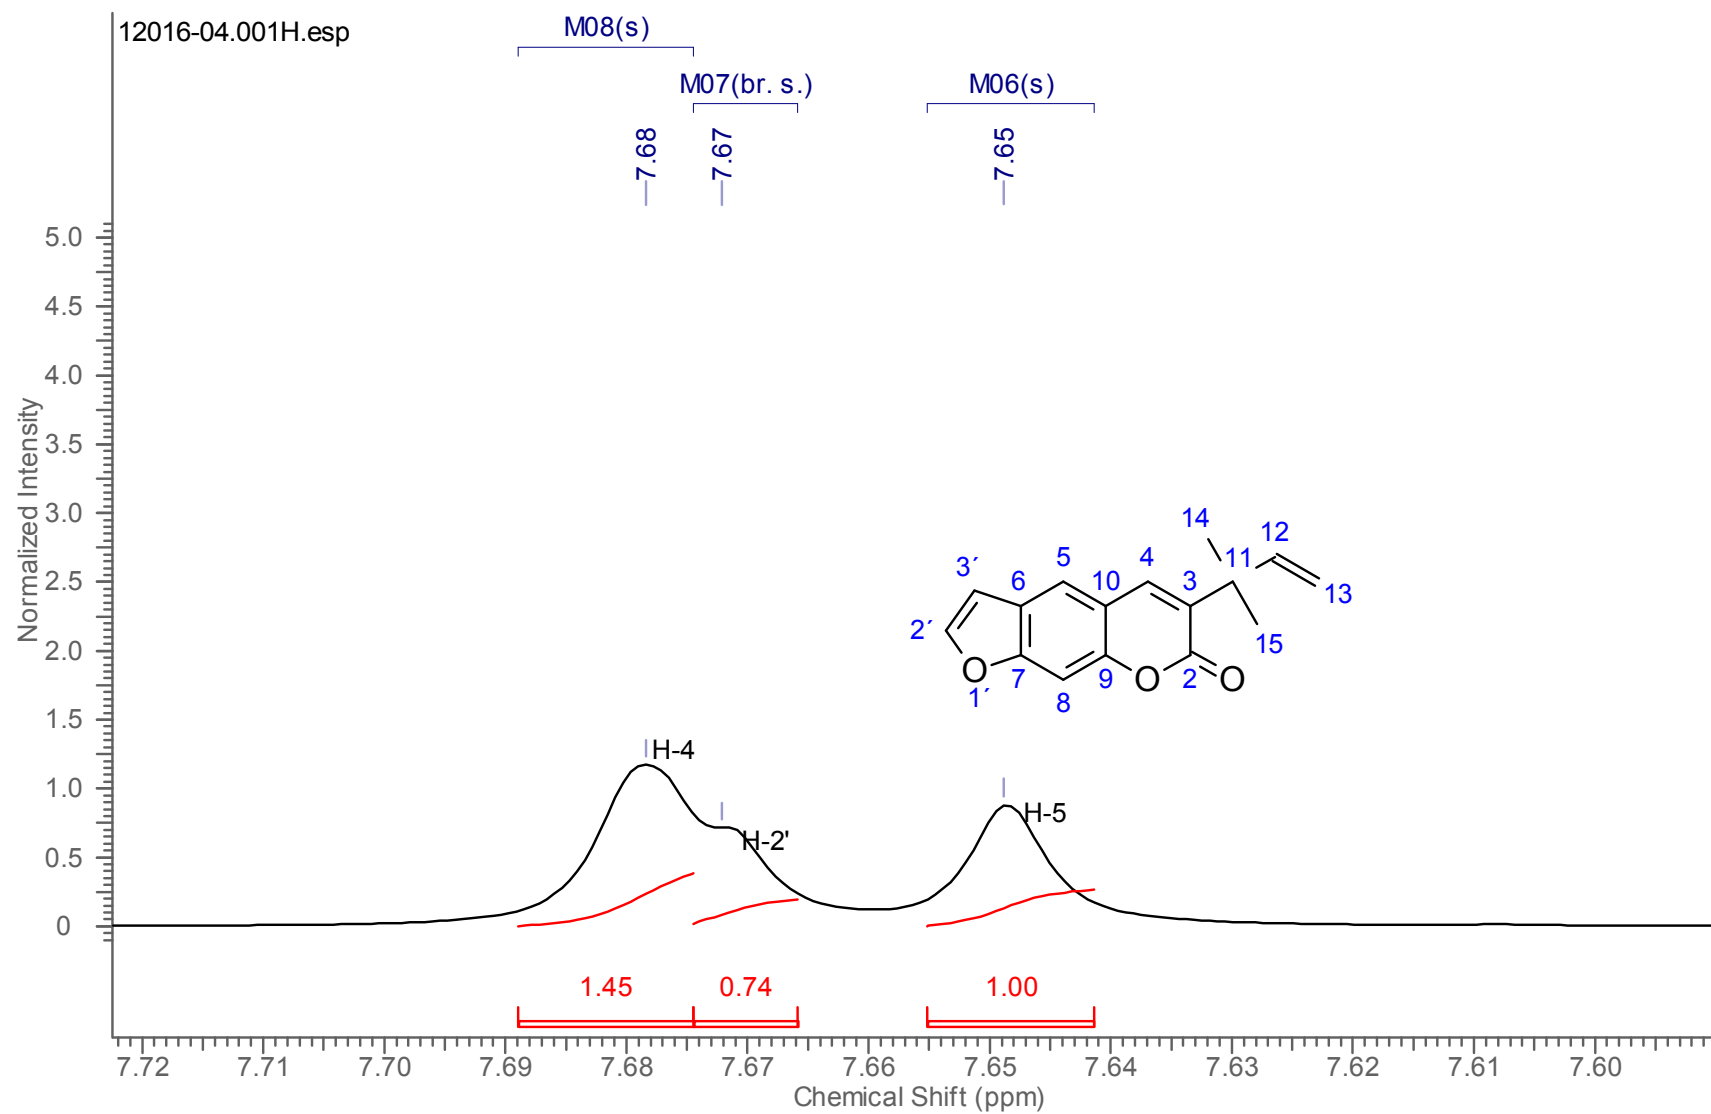

**Figure S8.**  $^{13}\text{C}$ -NMR spectrum of Chalepensin (**2**) ( $\text{CDCl}_3$ , 100 MHz).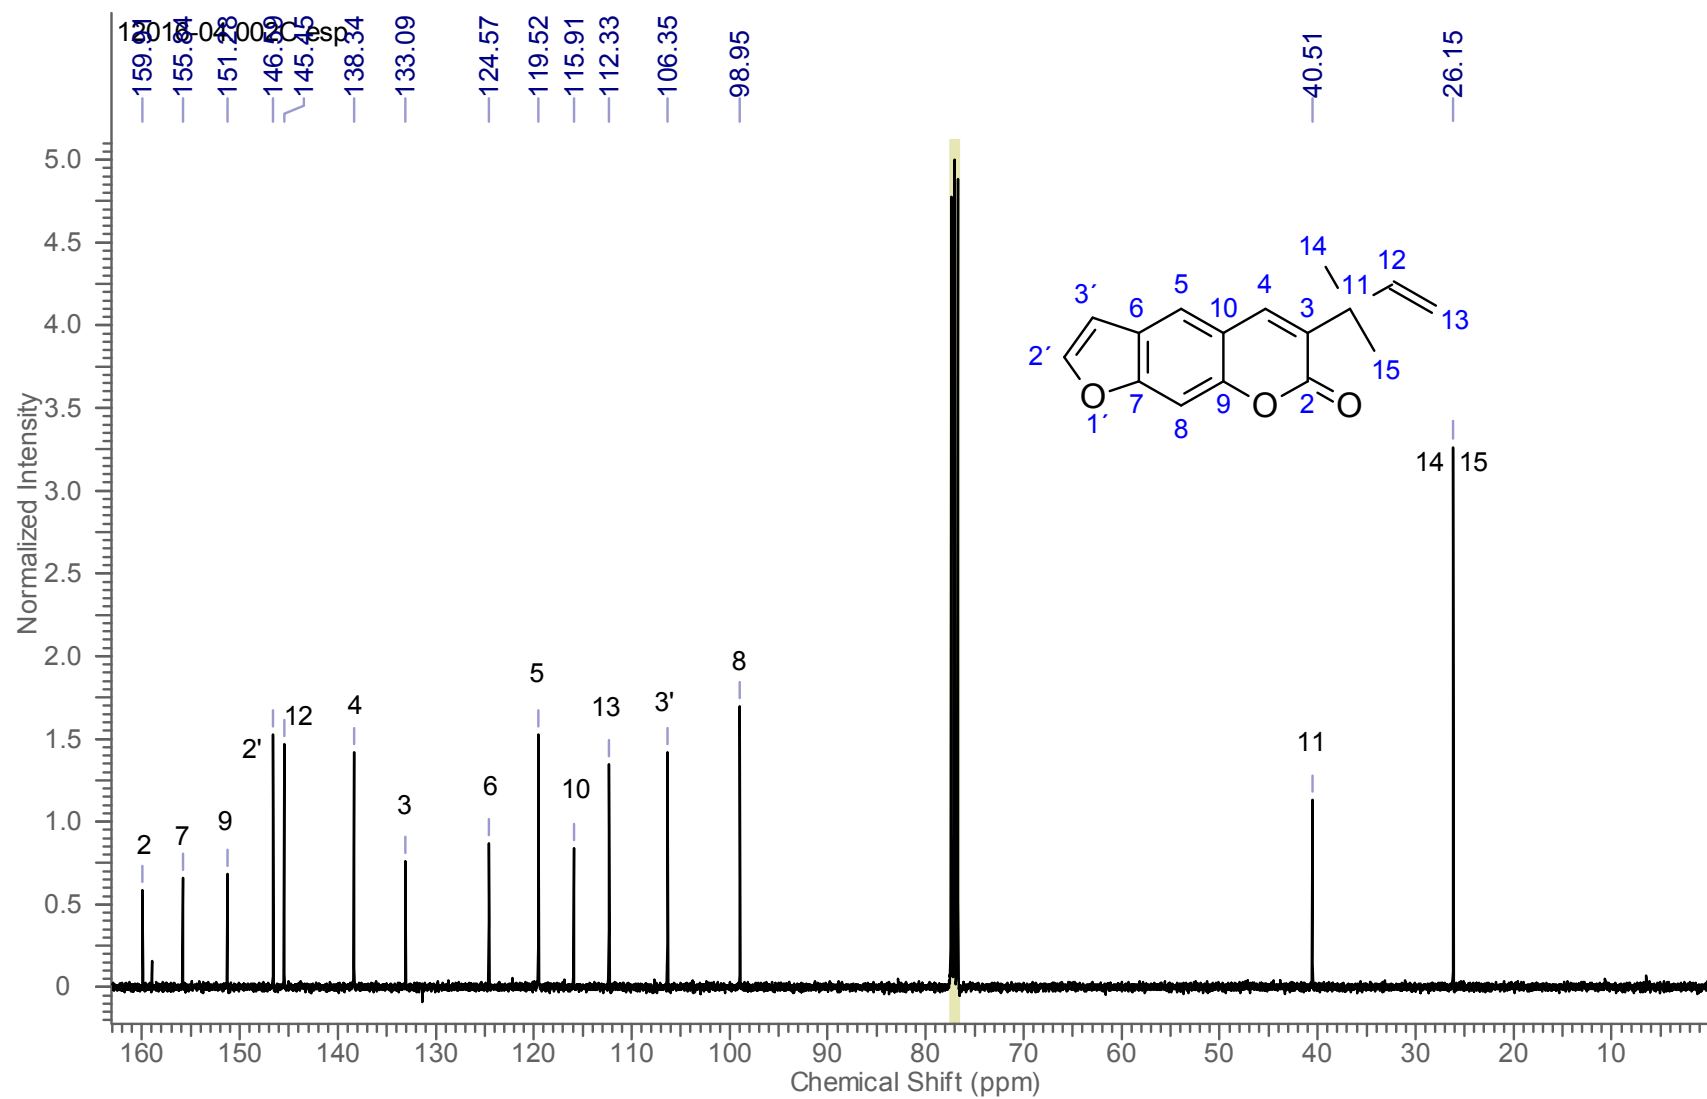



**Figure S9.** DEPT-135 spectrum of Chalepensisin (**2**) (CDCl<sub>3</sub>, 100 MHz).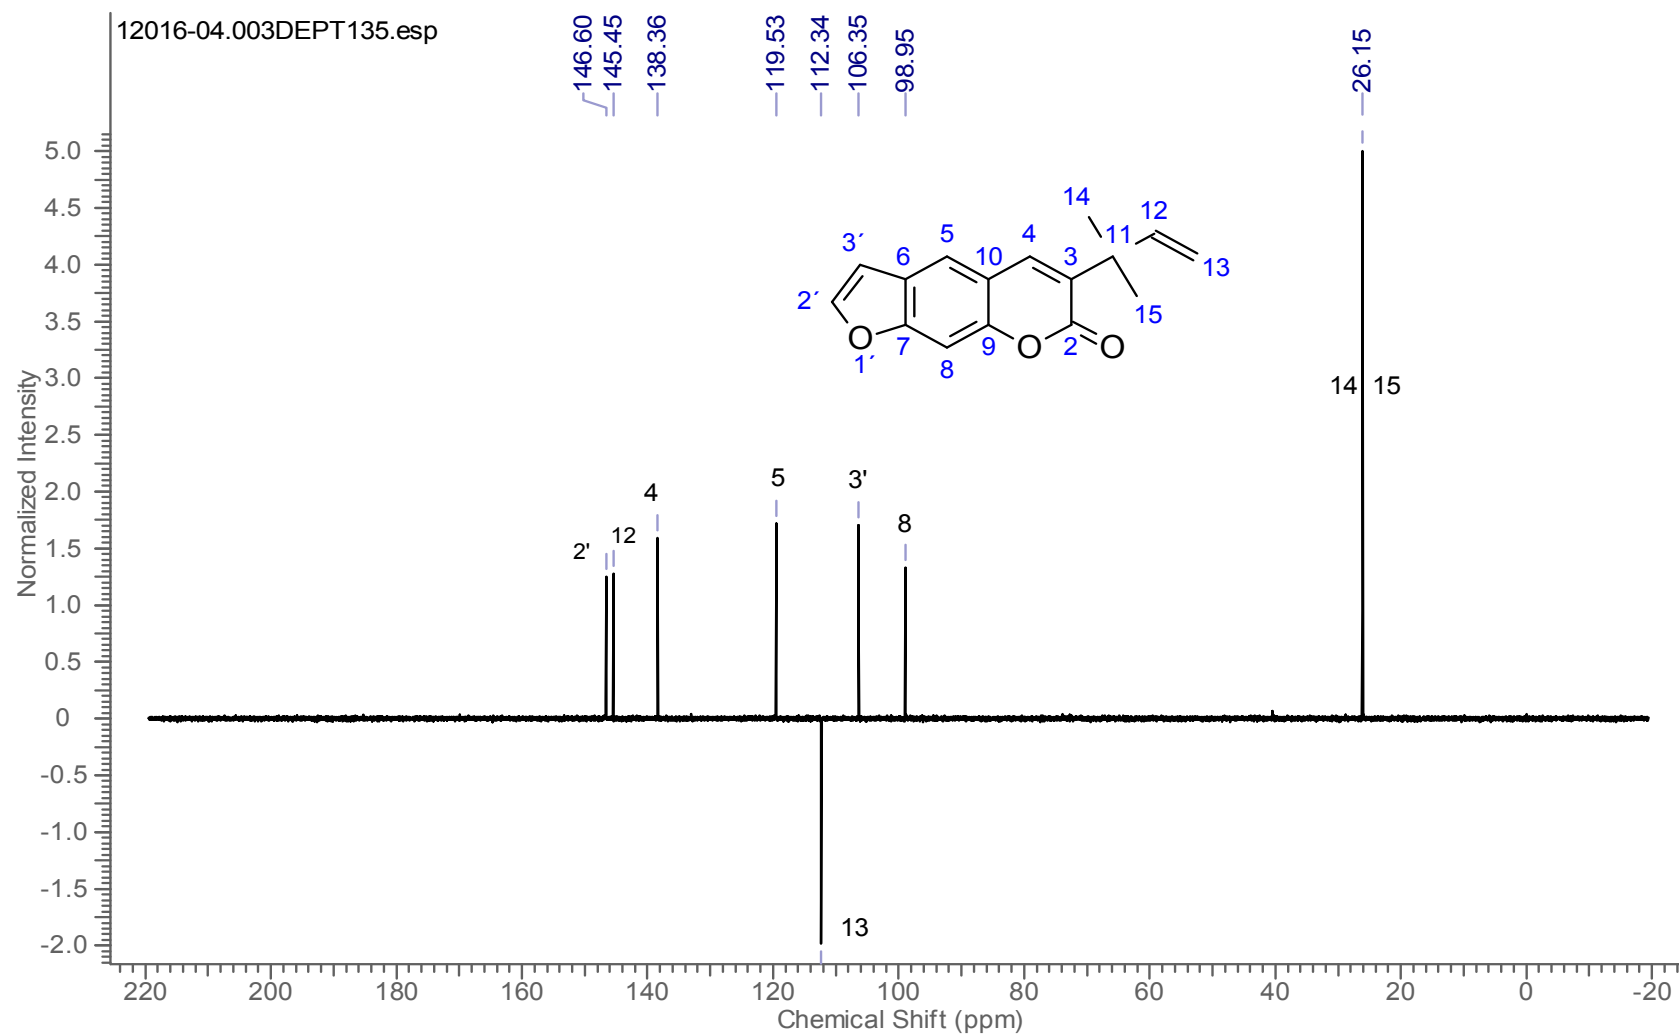

**Figure S10.**  $^1\text{H}$ - $^1\text{H}$  COSY spectrum of Chalepensisin (**2**) ( $\text{CDCl}_3$ , 400 MHz).

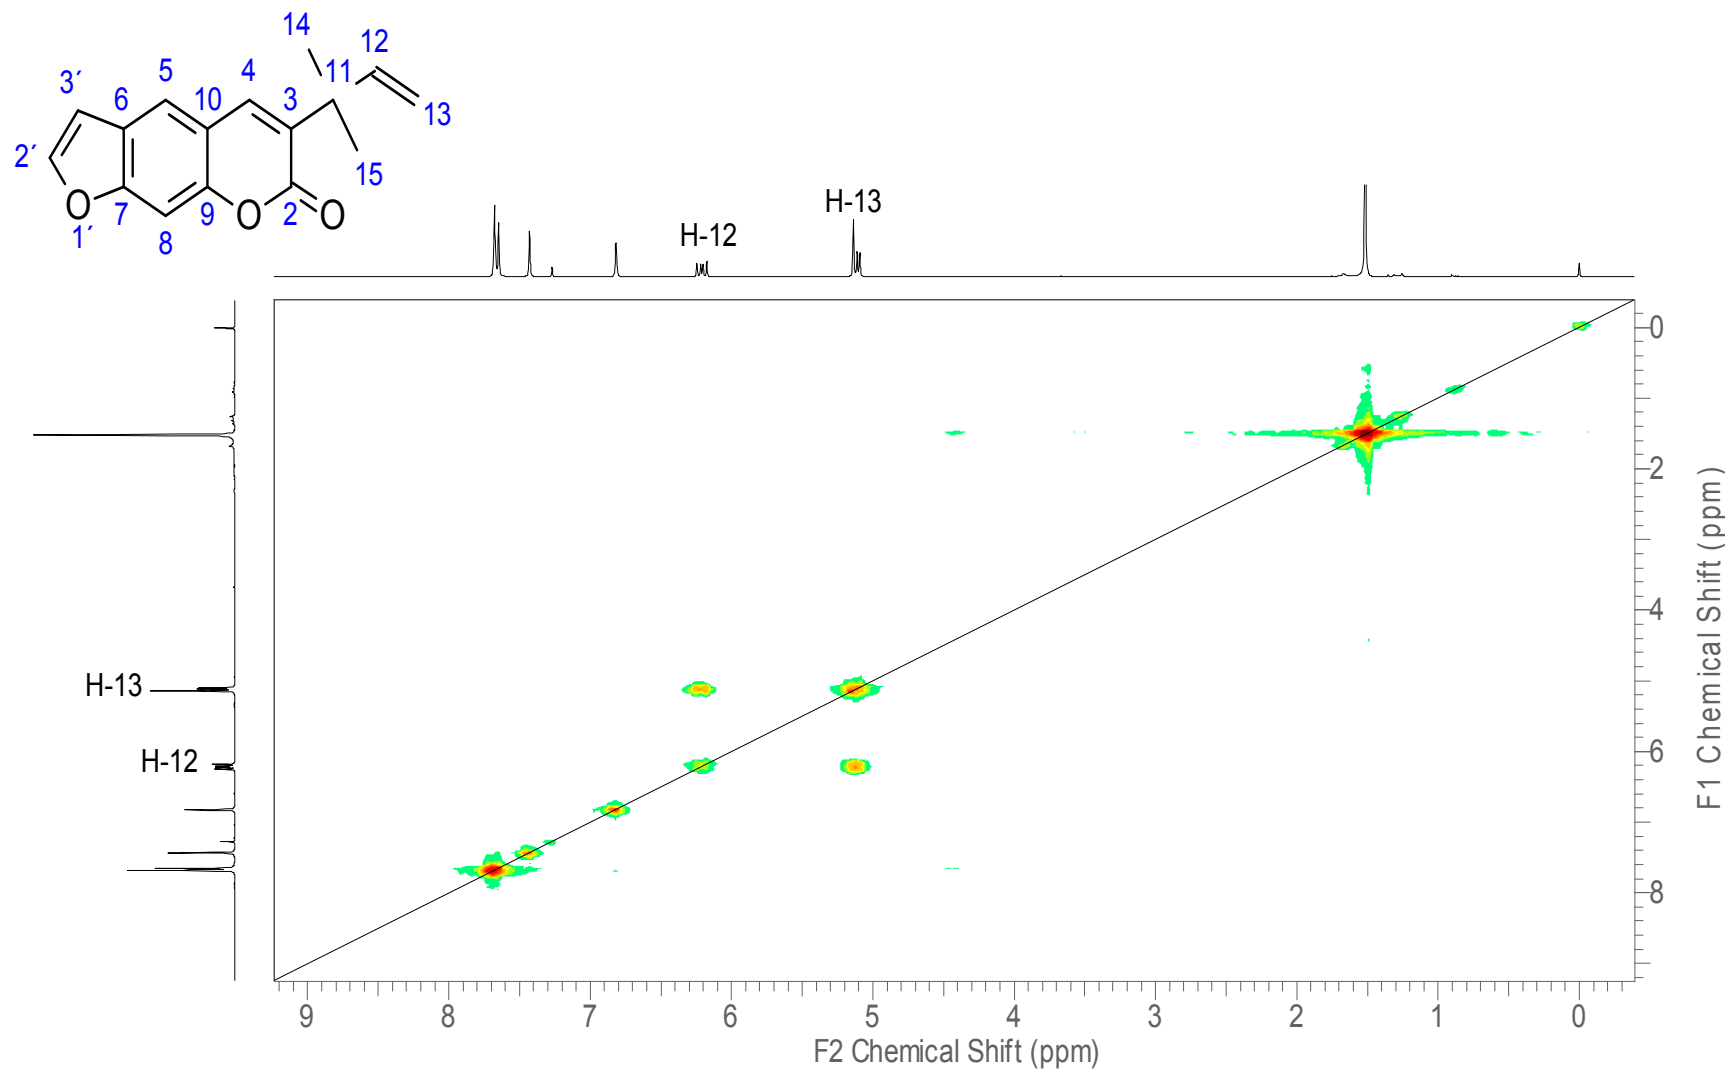

**Figure S11.**  $^1\text{H}$ - $^{13}\text{C}$ -HSQC spectrum of Chalepensisin (**2**) ( $\text{CDCl}_3$ , 100 MHz).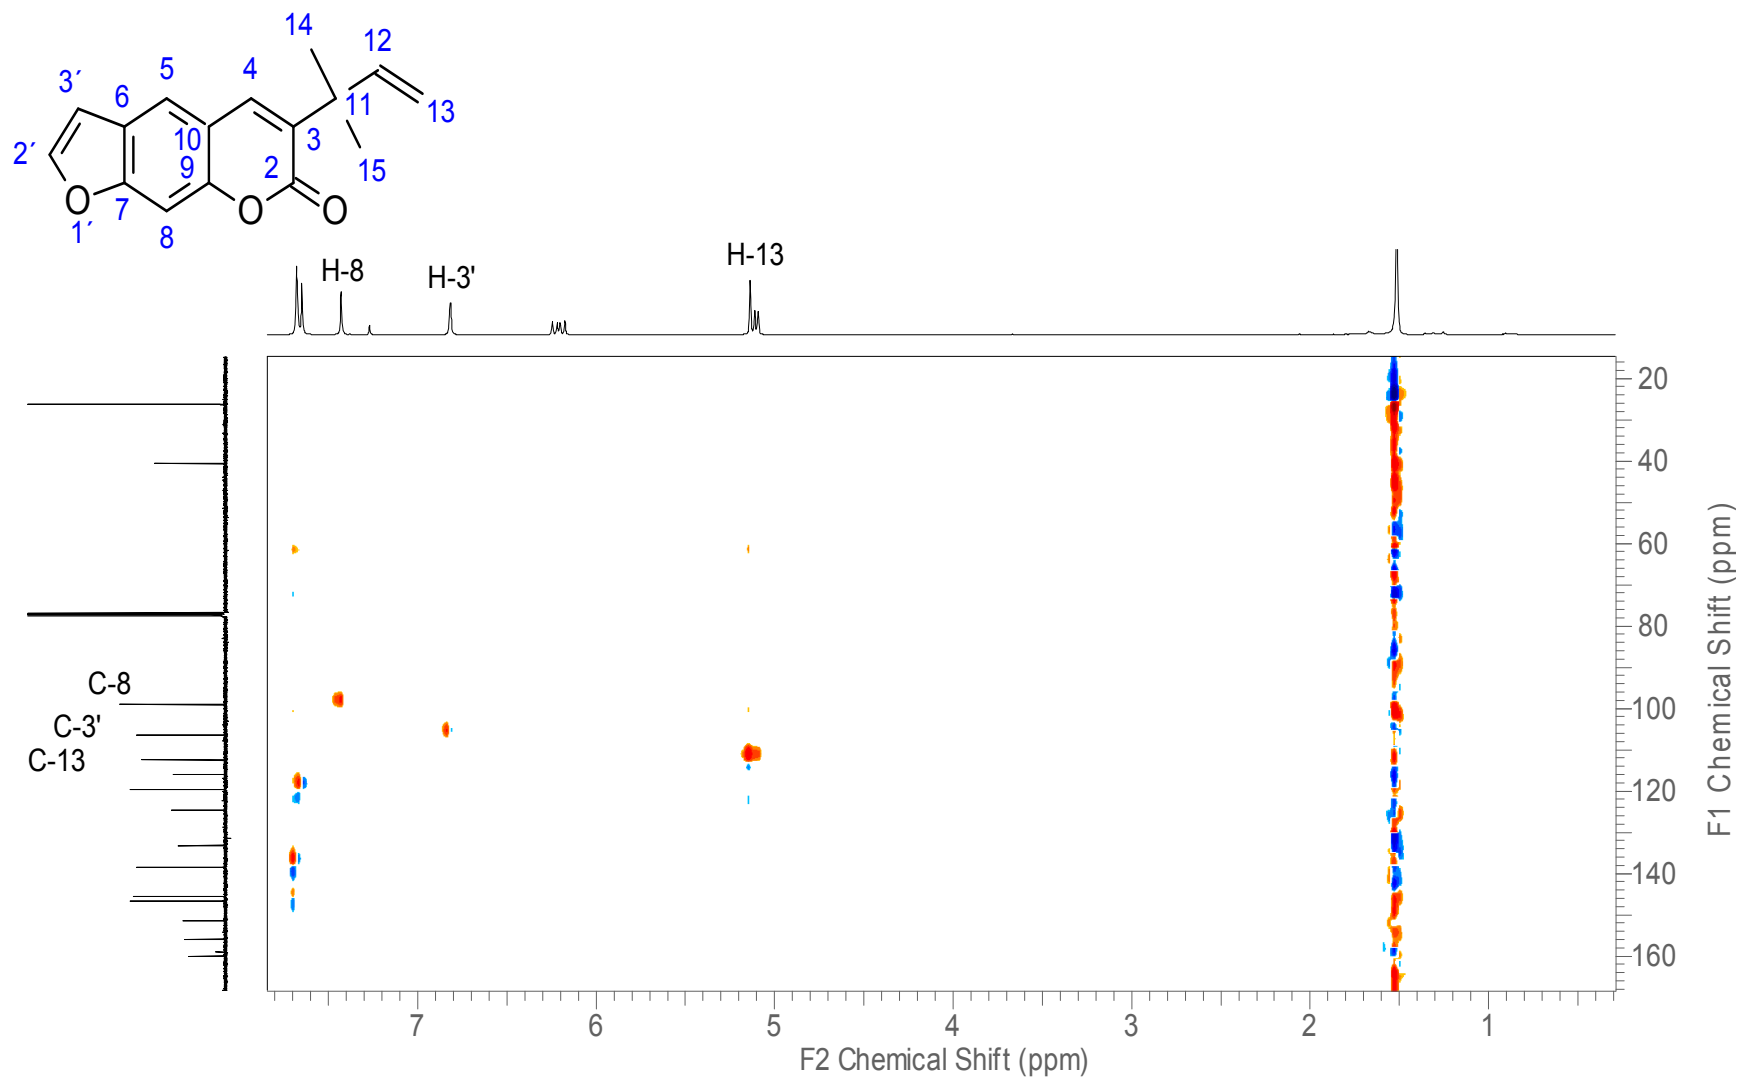

**Figure S12.**  $^1\text{H}$ - $^{13}\text{C}$ -HSQC spectrum of Chalepensin (**2**) ( $\text{CDCl}_3$ , 100 MHz).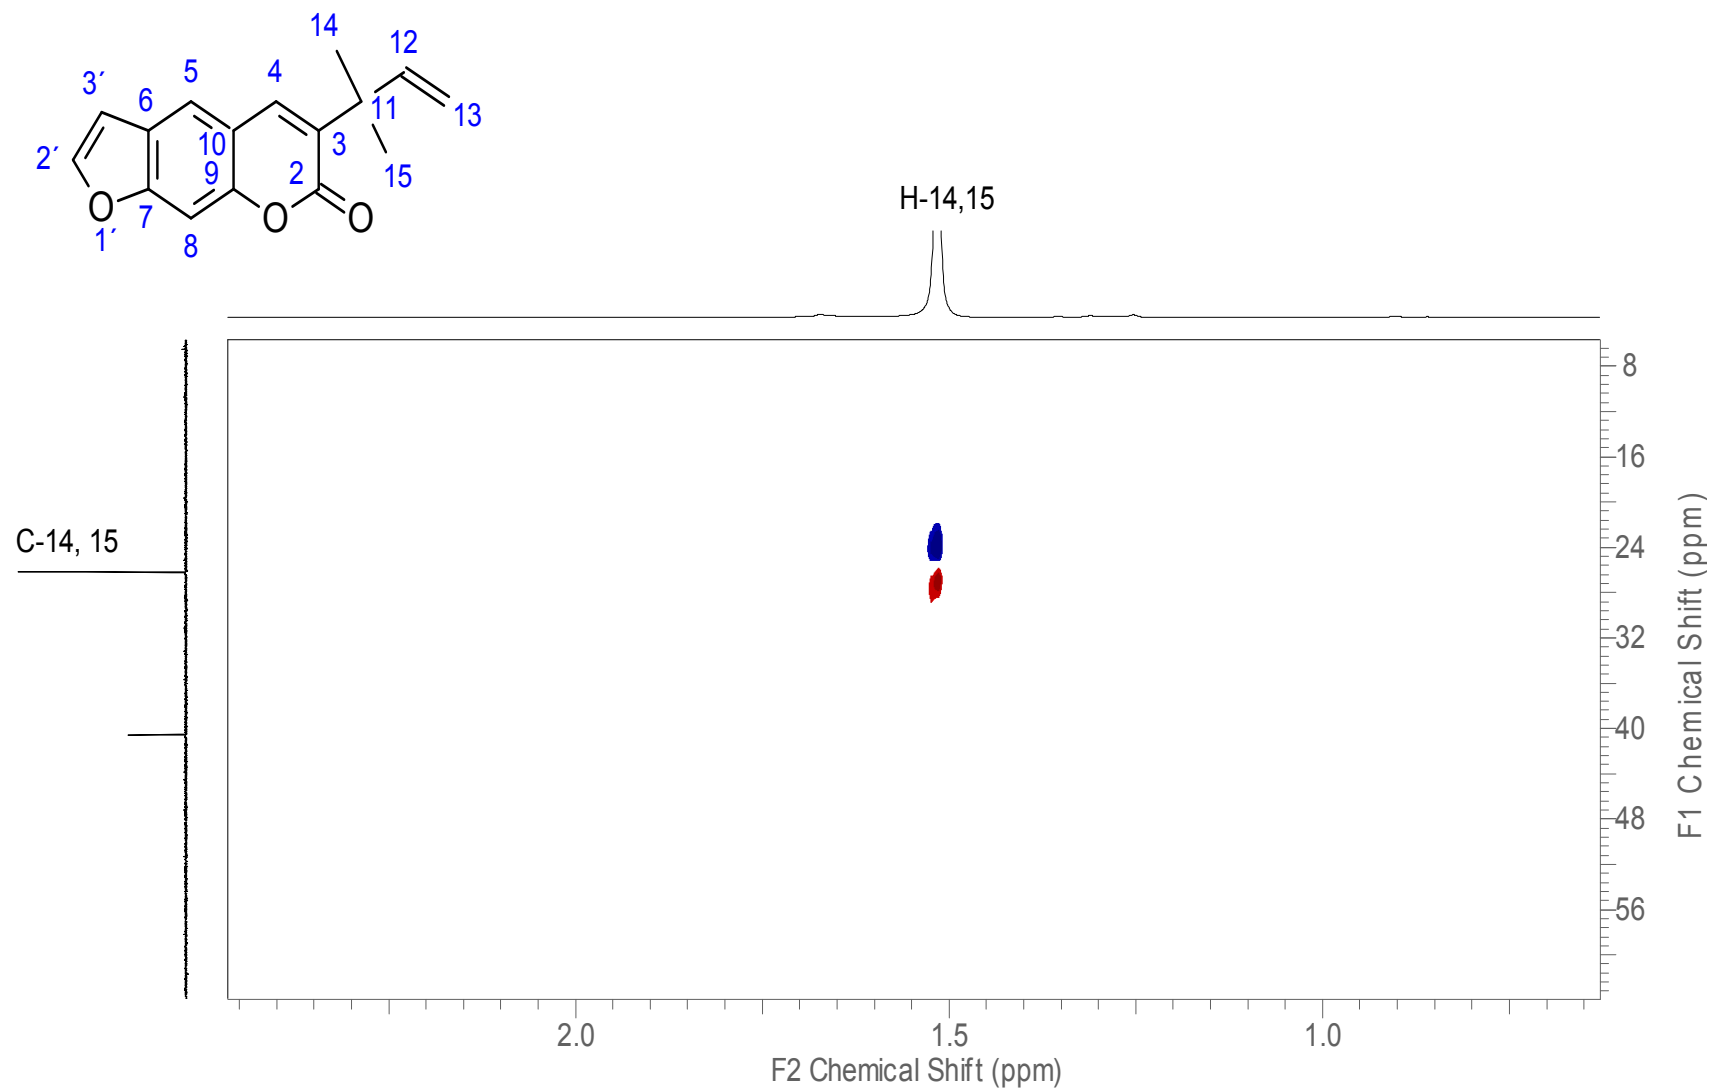

**Figure S13.**  $^1\text{H}$ - $^{13}\text{C}$ -HSQC spectrum of Chalepensin (**2**) ( $\text{CDCl}_3$ , 100 MHz).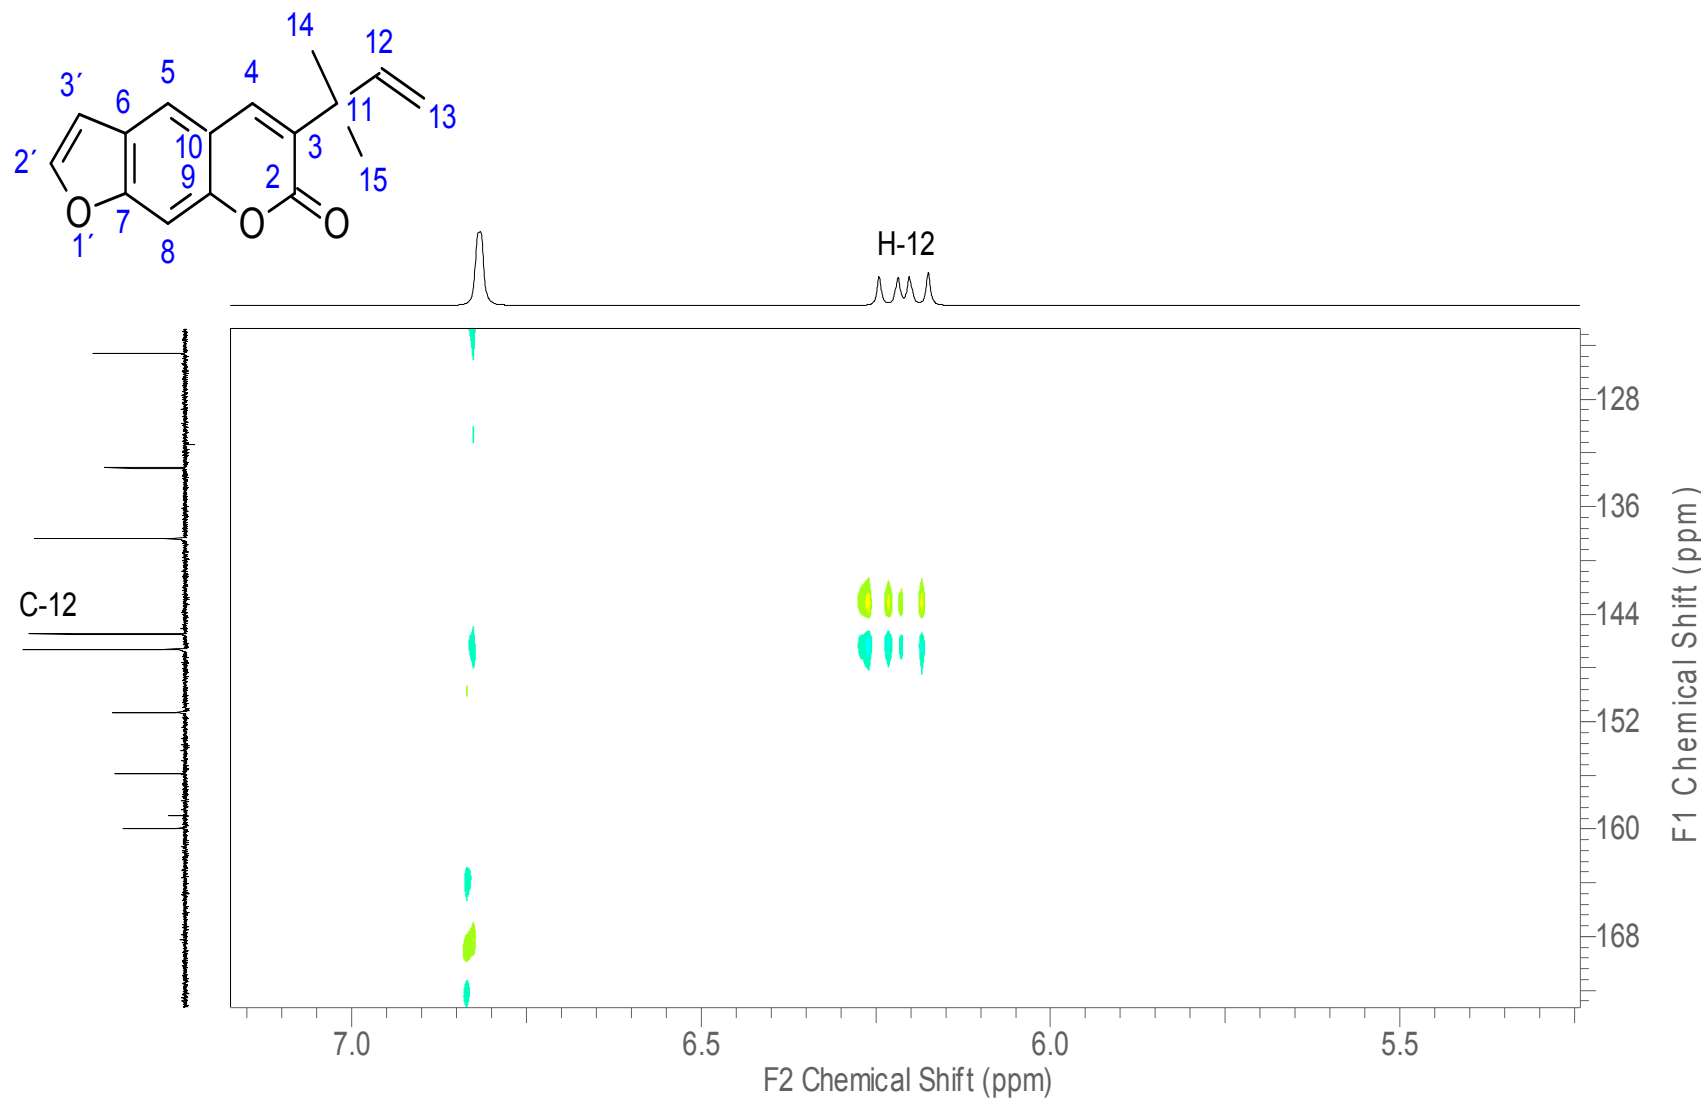

**Figure S14.**  $^1\text{H}$ - $^{13}\text{C}$ -HMBC spectrum of Chalepensisin (**2**) ( $\text{CDCl}_3$ , 100 MHz).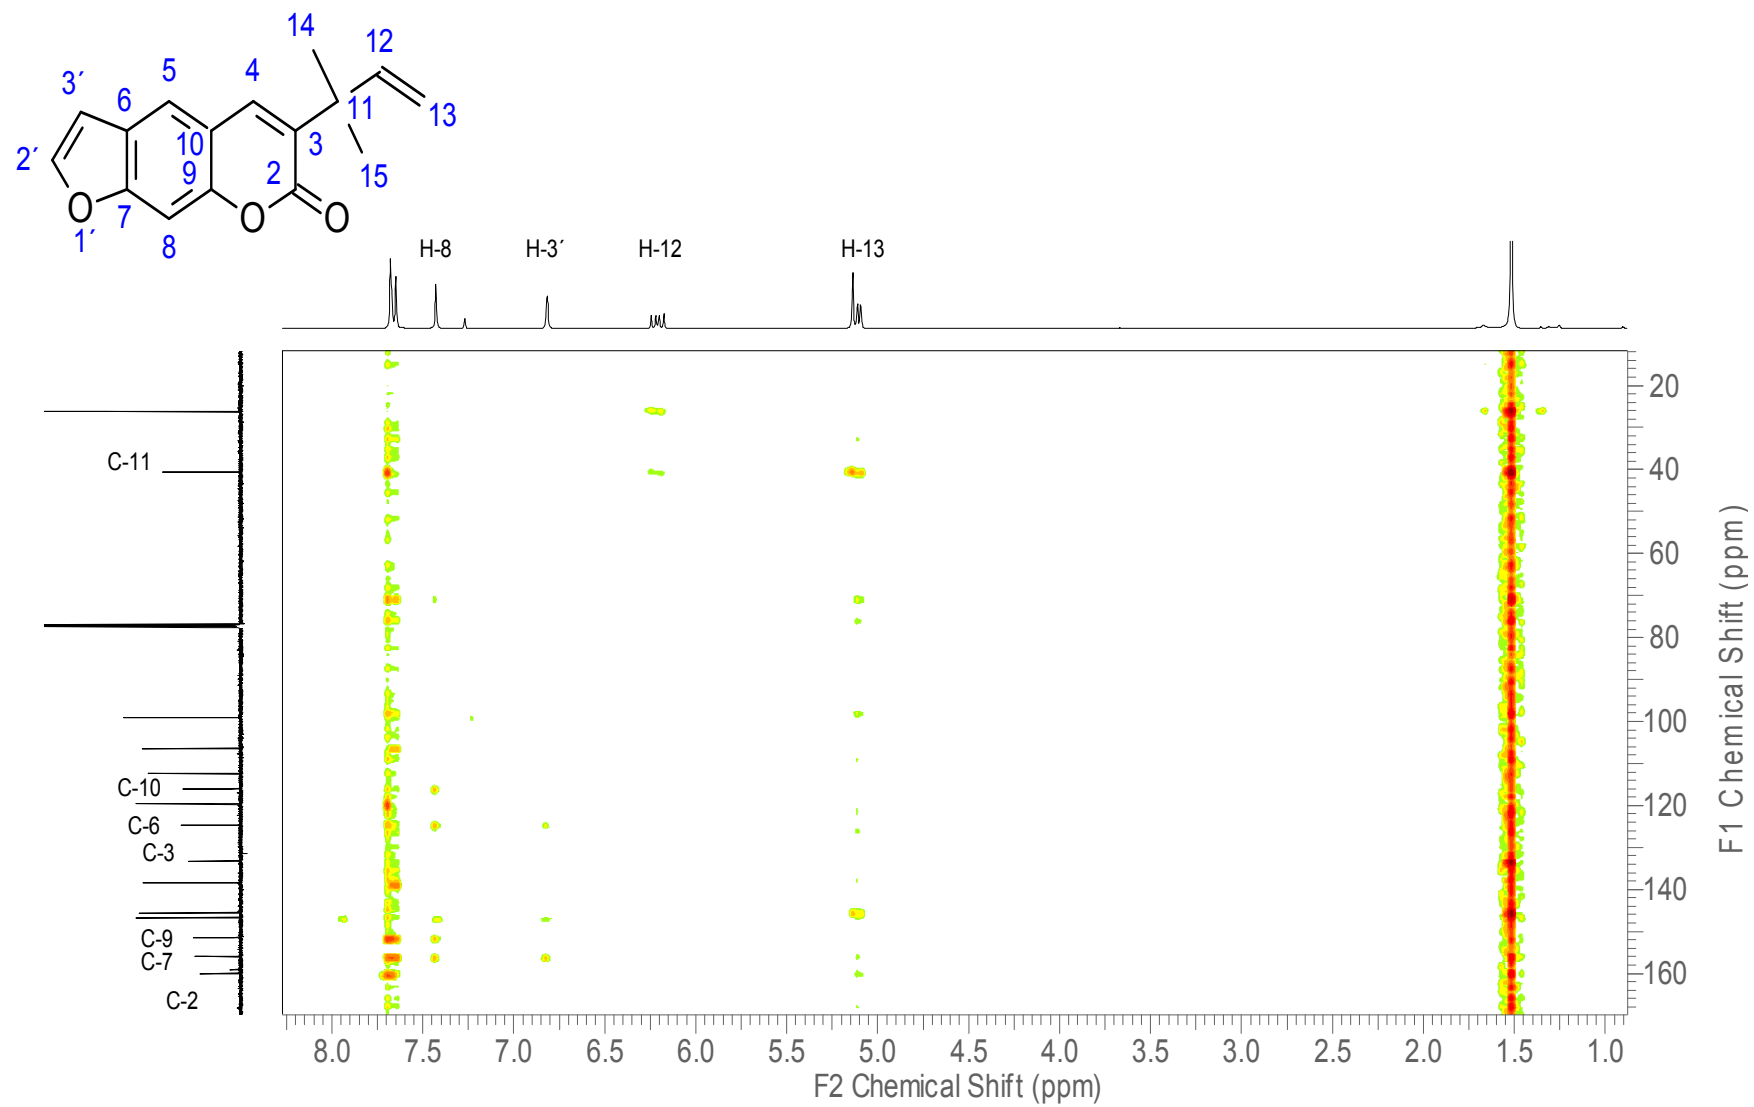

**Figure S15.**  $^1\text{H}$ - $^1\text{H}$ -NOESY spectrum of Chalepensin (**2**) ( $\text{CDCl}_3$ , 400 MHz).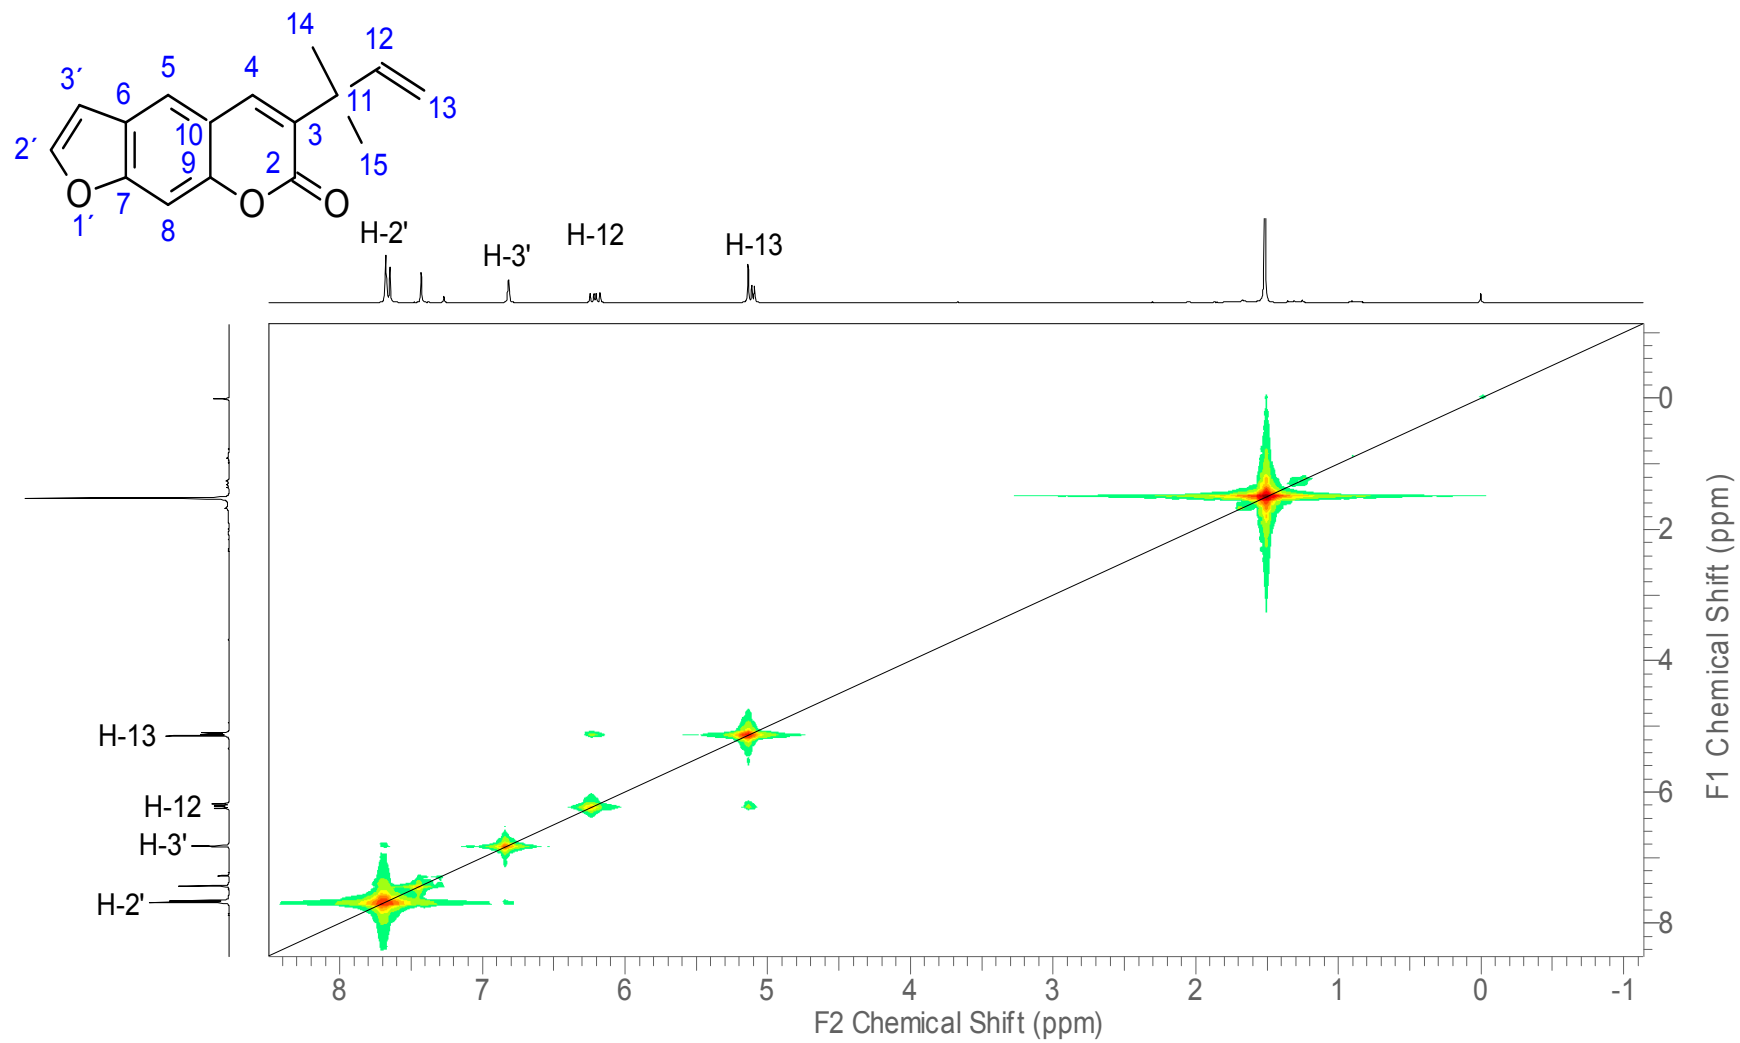

Supplement: molecules-19-21044-s001.pdf [file molecules-19-21044-s001.pdf]
